# Supplementary material for: A zebrafish screen for craniofacial mutants identifies wdr68 as a highly conserved gene required for endothelin-1 expression
Source: PubMed Central journal article supplement (PMC1523201; doi:10.1186/1471-213x-6-28), 2006-06-07

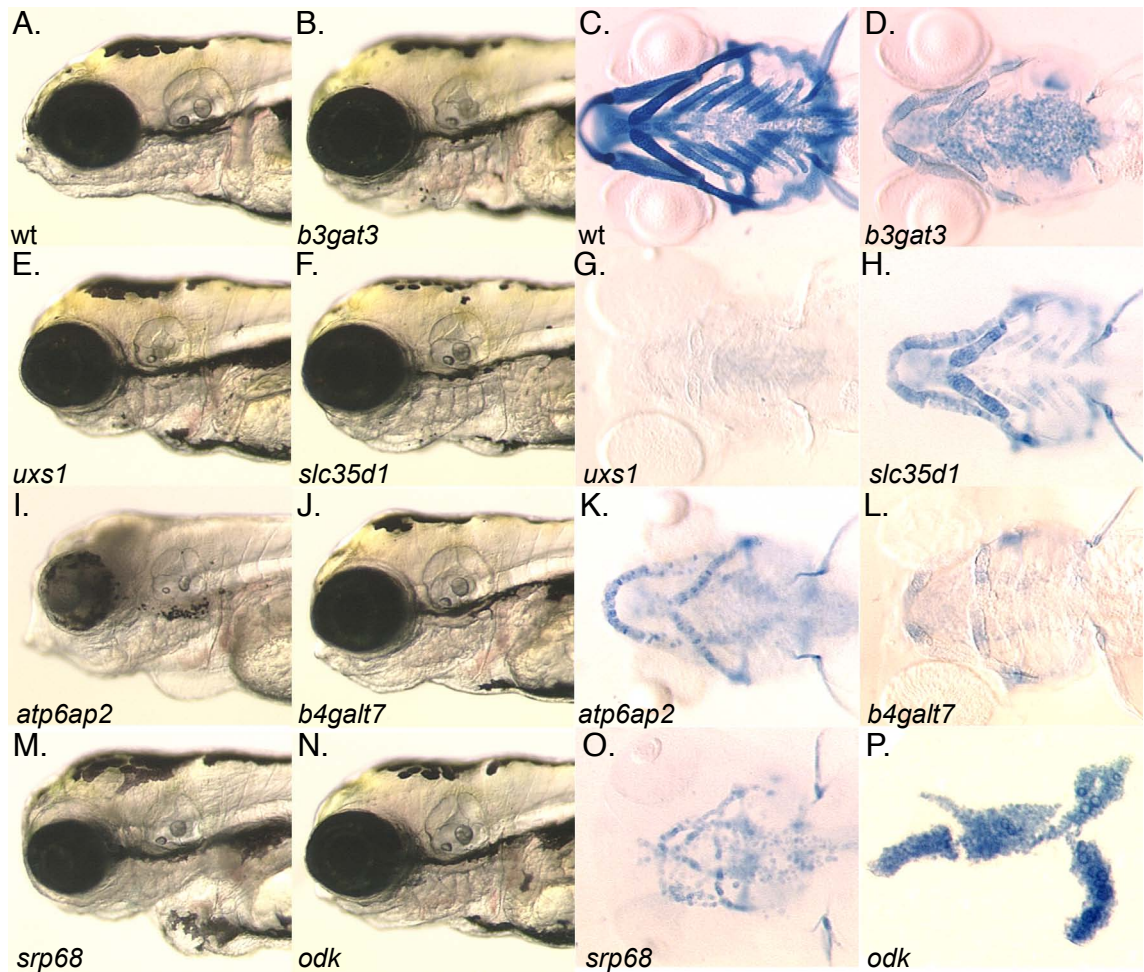

Supplement: 1471-213X-6-28-S1.pdf [file 1471-213X-6-28-S1.pdf]
